# Supplementary material for: Controlled thermal decomposition of aromatic polyethers to attain nanoporous carbon materials with enhanced gas storage
Source: Royal Society of Chemistry journal article supplement (doi:10.1039/c2ra20057k), 2012-01-01
Supplement: c2ra20057k.pdf [file c2ra20057k.pdf]

## Supporting Information

**Figure S1.** Pyrolysis mass spectra of PEEK collected at 505 °C (in vacuum) is displayed, in; heating rate 10 °C/min. the figure shows some main products, m/z 94 (phenol), along with a m/z of 121 ( $\text{HO-C}_6\text{H}_5\text{-CO}^+$ ) and m/z of 168 (possibly due to dibenzofuran). There are only two repeat units of the polymer (m/z 576), but absent of one repeat unit the monomer, at m/z 278.

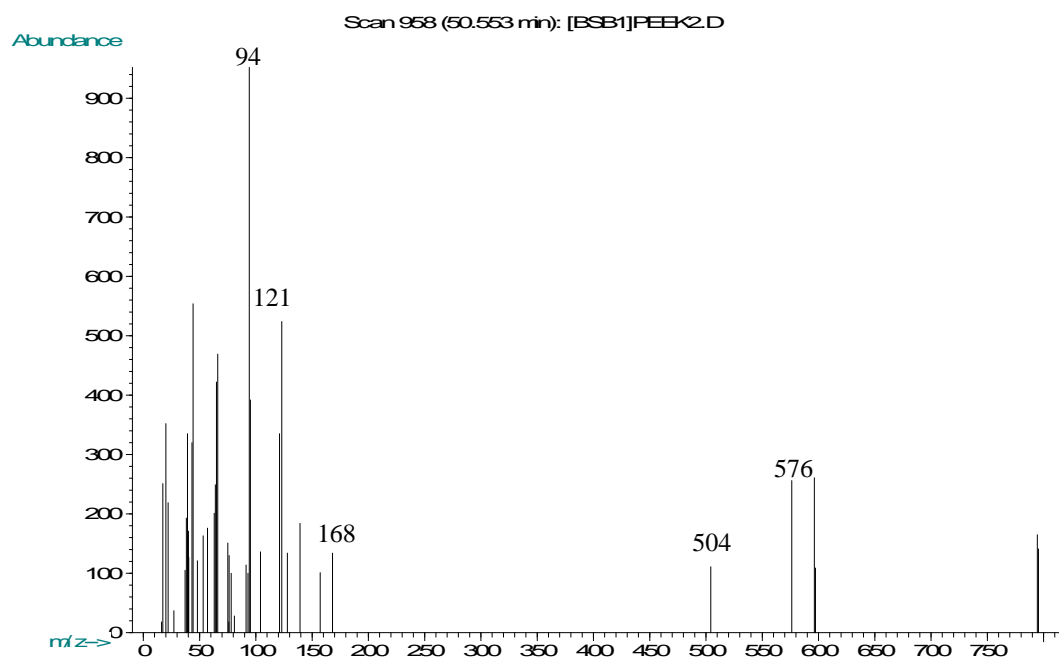

Figure S1 Py-MS spectrum of PEEK collected at 505 °C in vacuum. The heating rate was 10 °C/min.
